# Supplementary material for: Concentration, sources and light absorption characteristics ofdissolved organic carbon on a medium-sized valley glacier, northernTibetan Plateau
Source: Copernicus journal article supplement (doi:10.5194/tc-10-2611-2016), 2016-11-07
Supplement: Supplementary file 1 [file tc-10-2611-2016-supplement.pdf]

Supplement of The Cryosphere, 10, 2611–2621, 2016  
<http://www.the-cryosphere.net/10/2611/2016/>  
doi:10.5194/tc-10-2611-2016-supplement  
© Author(s) 2016. CC Attribution 3.0 License.

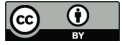

*Supplement of*

## **Concentration, sources and light absorption characteristics of dissolved organic carbon on a medium-sized valley glacier, northern Tibetan Plateau**

**Fangping Yan et al.**

*Correspondence to:* Shichang Kang (shichang.kang@lzb.ac.cn) and Chaoliu Li (lichaliu@itpcas.ac.cn)

The copyright of individual parts of the supplement might differ from the CC-BY 3.0 licence.

## **1 Methodology**

### Discharge data collection and analysis

The hydrological gauging site was installed approximately 0.8 km downstream of the glacier terminus and met the requirements for a hydrological gauging site. Horizontal walls were built on the both sides of the river, and an automatic barometric sensor (HOBO Water Level Logger, Onset, America) was installed in the wall to record water pressure every 10 minutes. This was then used to calculate water level. A bridge across the river facilitated the flow velocity measurement using a propeller blade current meter (Model LS25-1, Huazheng Hydrometric Instrument Ltd). The river channel was divided into nine segments in which flow velocity and water depth were measured. The mean flow velocity, segment width and water depth of each segment enabled calculation of discharge for a given water level. By including a maximum and minimum annual water level, a relationship with water level and discharge was established. Therefore, the HOBO water level was converted to a discharge time series covering all seasons.

## 2. Supporting Tables

**Table S1.** DOC concentrations of blank samples for the entire field work and analysis processes.

| Date               | Concentration ( $\mu\text{g L}^{-1}$ ) | Date               | Concentration ( $\mu\text{g L}^{-1}$ ) |
|--------------------|----------------------------------------|--------------------|----------------------------------------|
| 20 May, 2015       | 28                                     | 30 May, 2015       | 49                                     |
| 2 June, 2015       | 31                                     | 15 June, 2015      | 28                                     |
| 25 June, 2015      | 27                                     | 5 July, 2015       | 26                                     |
| 16 July, 2015      | 30                                     | 25 July, 2015      | 25                                     |
| 15 August, 2015    | 37                                     | 25 August, 2015    | 29                                     |
| 15 August, 2015    | 38                                     | 19 August, 2015    | 30                                     |
| 5 September, 2015  | 23                                     | 12 September, 2015 | 51                                     |
| 19 September, 2015 | 30                                     | 27 September, 2015 | 33                                     |
| 5 October 2015     | 23                                     | 30, July, 2014     | 31                                     |
| 4 August, 2014     | 33                                     | 6 August, 2014     | 36                                     |
| Mean               | $32 \pm 7$                             |                    |                                        |

**Table S2.** Information of the studied glaciers and DOC concentrations ( $\mu\text{g L}^{-1}$ ) of proglacial streamwater samples across the TP.

| Glacier ID | Glacier name            | Mountain range   | DOC (monsoon) | DOC<br>(non-monsoon) |
|------------|-------------------------|------------------|---------------|----------------------|
| LHG        | Laohugou Glacier No. 12 | Qilian           | 325           | 394                  |
| TGL        | Xiaodongkemadi Glacier  | Tanggula         | 150           | 212                  |
| EV         | East Rongbu Glacier     | Middle Himalaya  | 139           | 171                  |
| ZD         | Zhadang Glacier         | Nyainq êntanglha | 169           | 222                  |
| DML        | Demula Glacier          | Eastern Himalaya | 103           | 134                  |
| QY         | Qiangyong Glacier       | Central Himalaya | 124           | 167                  |

### 3. Supporting figures

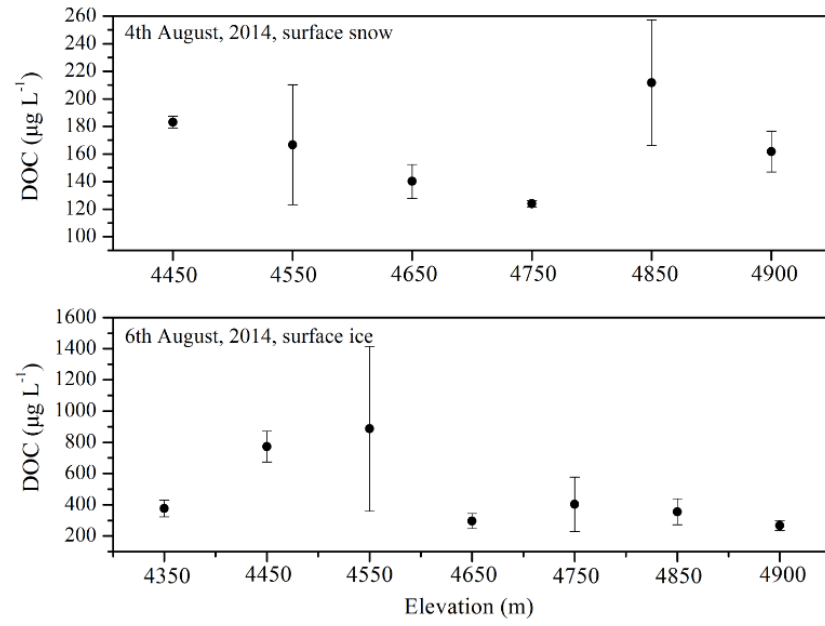

**Figure S1.** Spatial variations in DOC concentrations for surface snow and ice at LHG Glacier.

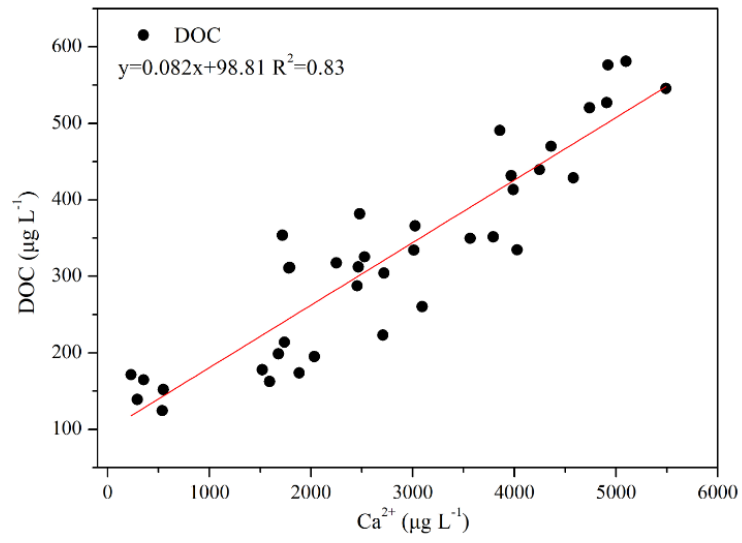

**Figure S2.** Relationship between concentrations of Ca<sup>2+</sup> and DOC in snowpit samples.

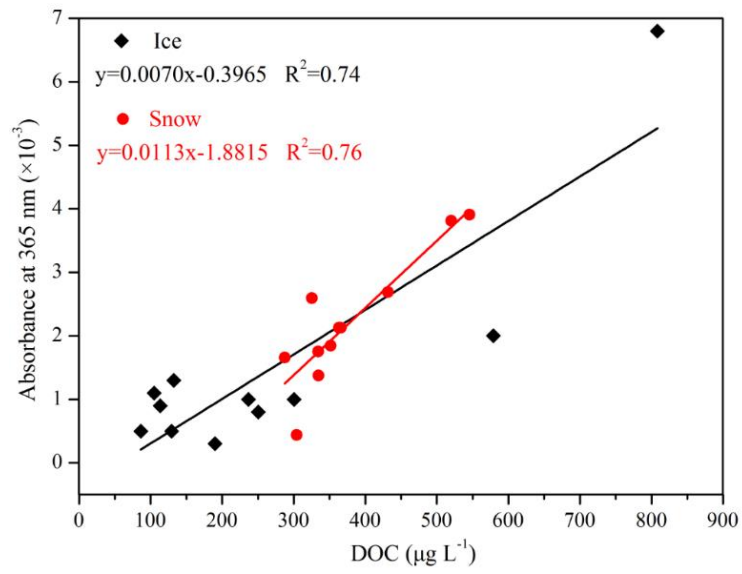

**Figure S3.** Relationship between light absorbance at 365 nm and DOC concentrations in snow and ice samples.

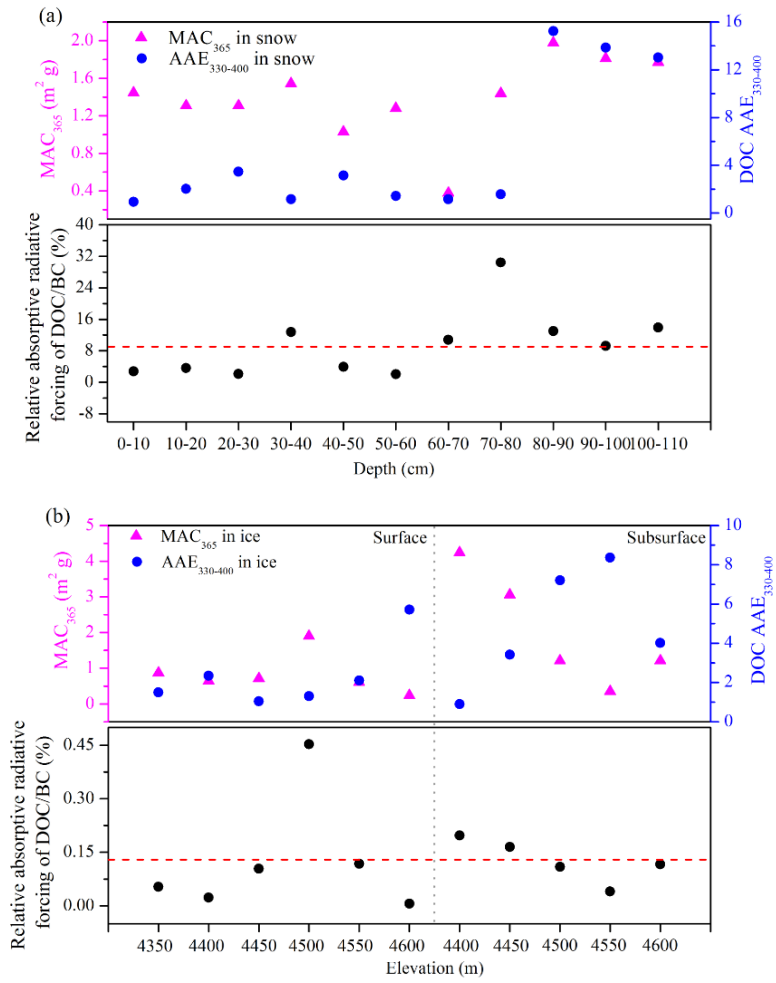

**Figure S4.** Light absorption characteristics and relative contribution to radiative forcing of DOC versus BC in snow (a) and ice (b) samples.



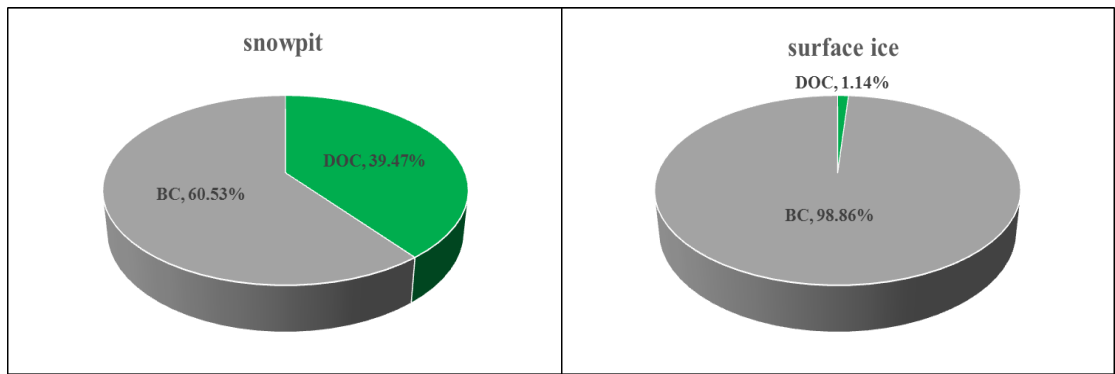

**Figure S5.** The DOC/BC ratios of snow and ice in LHG Glacier.

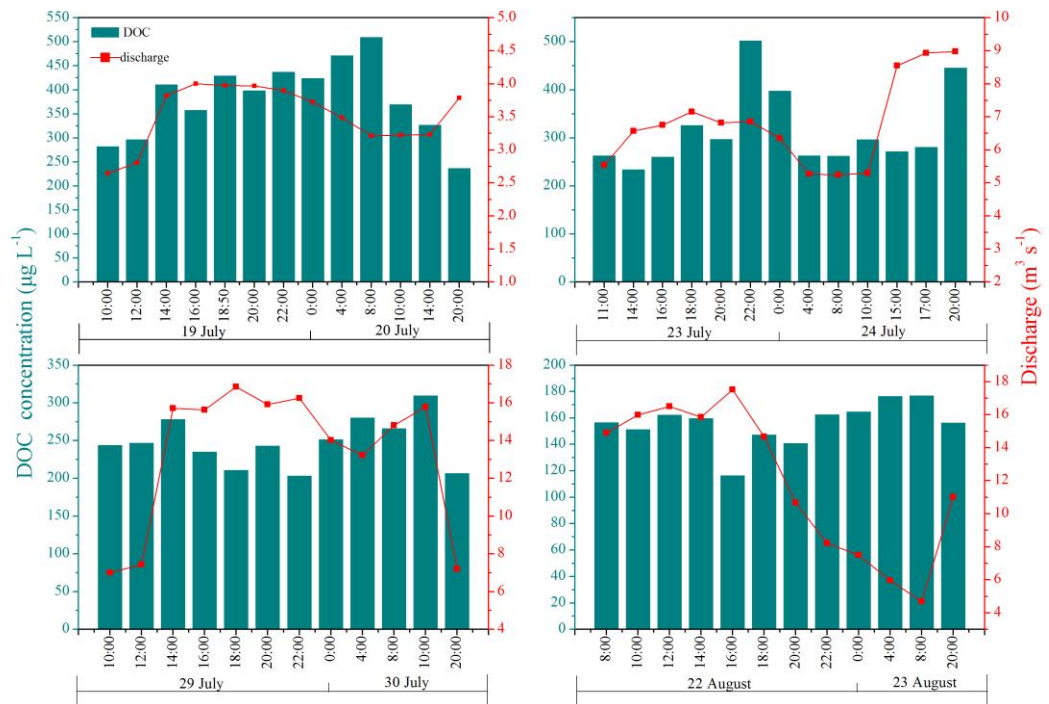

**Figure S6.** Diurnal variations in the DOC concentration and discharge at the gauge station in 2015 (local time, hh:mm).
